# Supplementary material for: Biowaste valorization: multifunctional hybrid lignin/TiO2 nanostructures for bacterial-biocide disinfection and dye removal
Source: Royal Society of Chemistry journal article supplement (doi:10.1039/d4en00091a), 2024-01-01
Supplement: d4en00091a1.pdf [file d4en00091a1.pdf]

## Supplementary materials

### **Biowaste valorization: multifunctional hybrid Lignin/TiO<sub>2</sub> nanostructures for bacterial-biocide disinfection and dye removal.**

Marica Gallo <sup>a</sup>, Virginia Venezia <sup>a,b\*</sup>, Marica Muscetta <sup>a\*</sup>, Rossella Grappa <sup>a</sup>, Mariavittoria Verrillo <sup>c</sup>, Gianluca Landi <sup>d</sup>, Raffaele Marotta <sup>a</sup>, and Giuseppina Luciani <sup>a</sup>

<sup>a</sup> DICMaPI, Department of Chemical, Materials and Industrial Production Engineering,  
University of Naples Federico II, Naples, Italy

<sup>b</sup> DiSt, Department of Structures for Engineering and Architecture, University of Naples  
Federico II, Naples, Italy

<sup>c</sup> Department of Agricultural Science, University of Naples Federico II, Portici, Italy

<sup>d</sup> Institute of Sciences and Technologies for Sustainable Energy and Mobility-CNR, Naples,  
Italy

**Corresponding authors:** [virginia.venezia@unina.it](mailto:virginia.venezia@unina.it); [marica.muscetta@unina.it](mailto:marica.muscetta@unina.it)

## **Summary**

### **1. Photocatalytic activity**

**Figure S-1**

### **2. Results and Discussion**

#### **2.1 Physico-chemical characterization of hybrid TiO<sub>2</sub>\_DL nanoparticles**

**Table S-1**

**Figure S-2**

**Figure S-3**

**Figure S-4**

**Table S-2**

**Figure S-5**

**Figure S-6**

**Table S-3**

**Figure S-7**

**Figure S-8**

#### **2.2 Functional characterization of hybrid nanoparticles**

**Figure S-9**

**Figure S-10**

**Figure S-11**

#### **2.3 Antimicrobial and the antifungal characterization of hybrid nanoparticles**

**Figure S-12**

### **3. Organic dyes removal: adsorption and photocatalytic degradation**

**Figure S-13**

**Figure S-14**

**Figure S-15**

**Figure S-16**

**Figure S-17**

## S.1. Experimental Setup

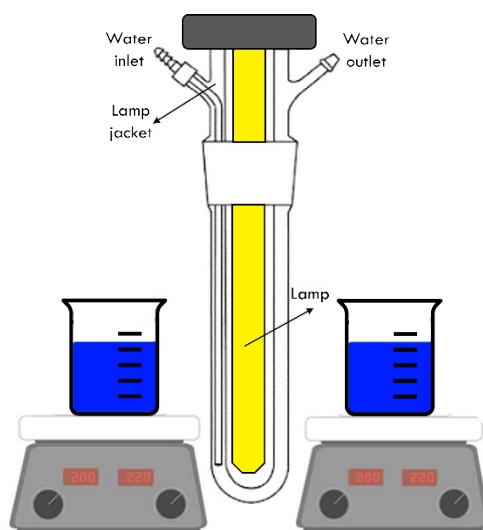

**Figure S-1.** Schematic illustration of the experimental set-up used for the photodegradation experiments.

## S.2. Materials characterization

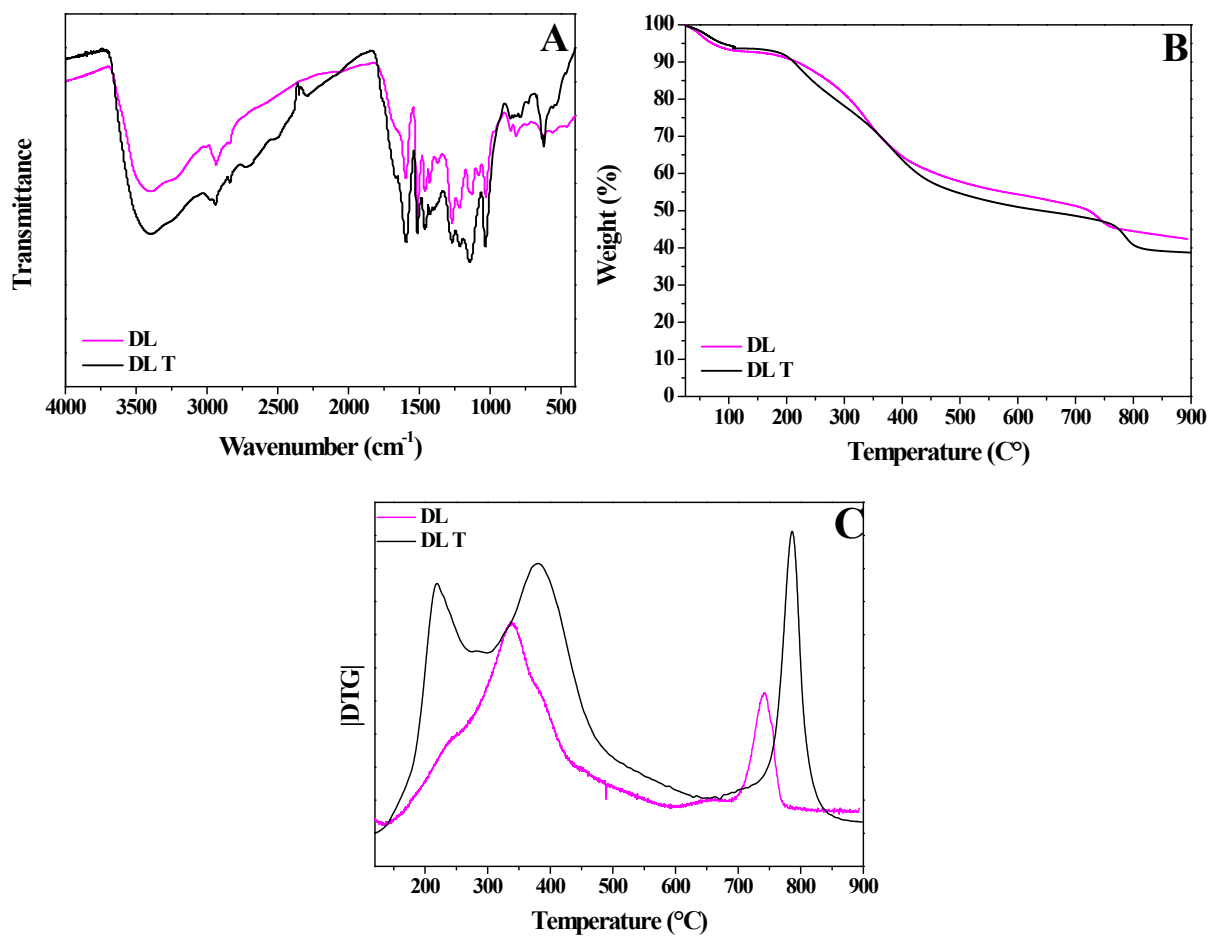

**Figure S-2.** FT-IR curves of DL and DL T (Panel A); TGA curves of DL and DL T samples (Panel B); DTG curves of DL and DL T samples (Panel C).

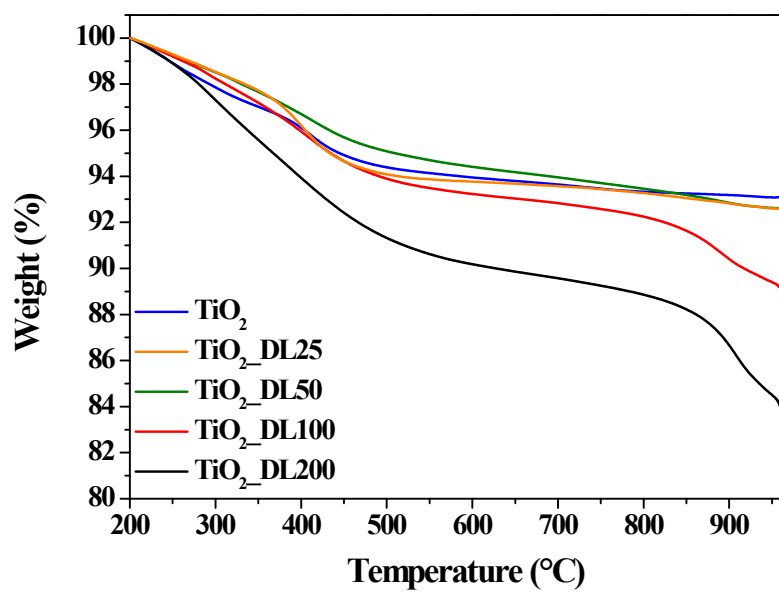

**Figure S-3.** TGA Curves of Bare TiO<sub>2</sub> and hybrid nanoparticles.

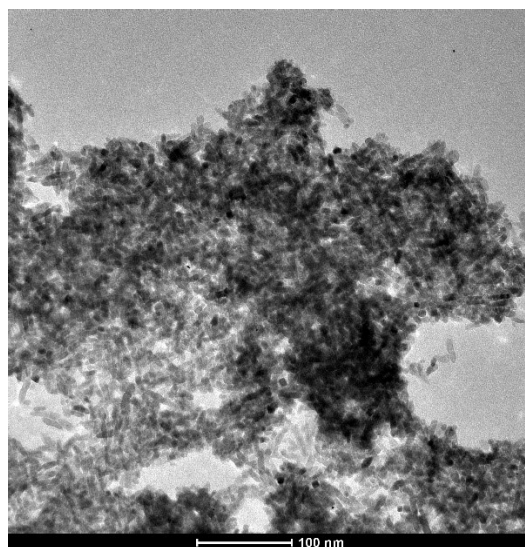

**Figure S-4.** TEM Micrograph of TiO<sub>2</sub> nanoparticles.

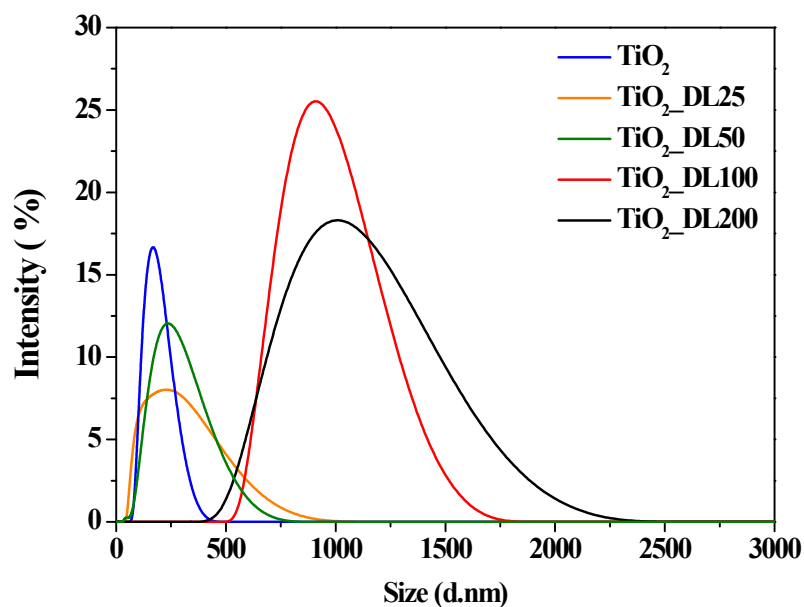

Figure S-5: Size distribution of bare TiO<sub>2</sub> and hybrid TiO<sub>2</sub>\_DL nanoparticles.

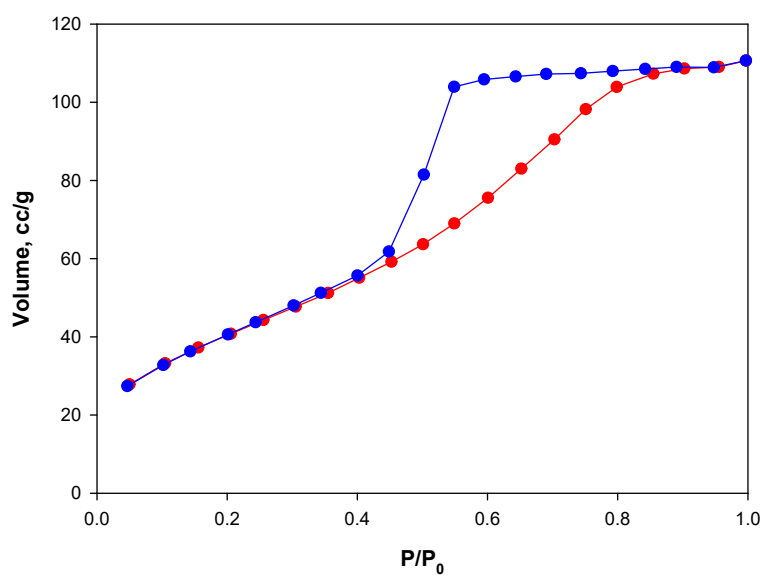

Figure S-6. N<sub>2</sub> adsorption isotherms at 77 K representative of all nanoparticles.

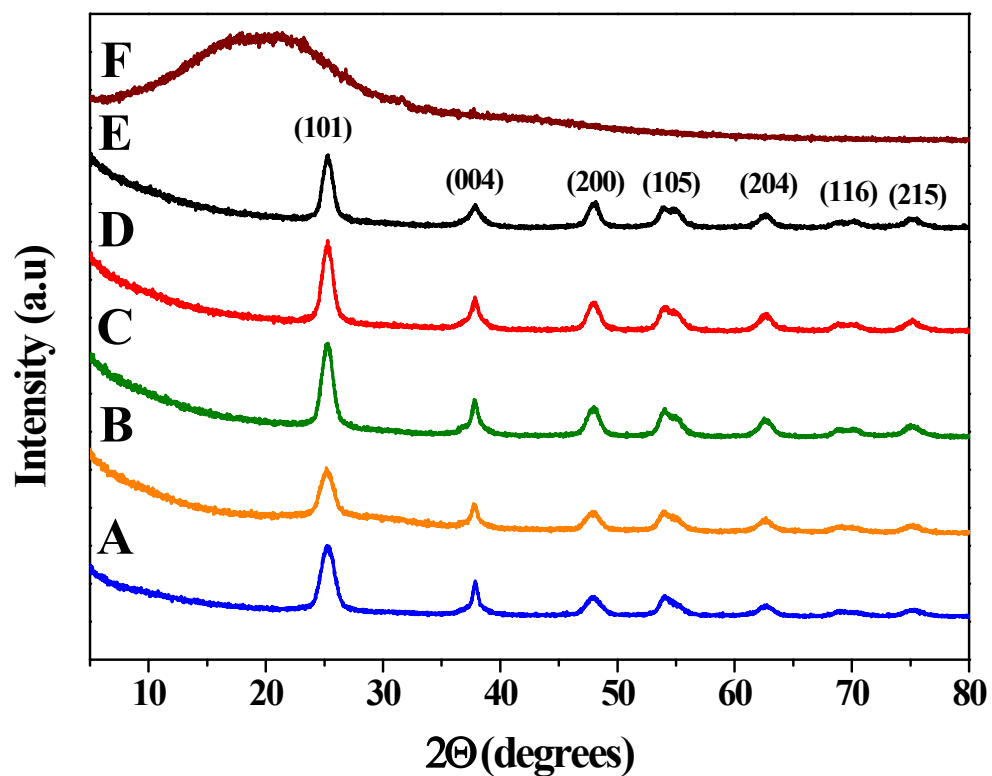

Figure S-7. XRD Spectra of: A)  $\text{TiO}_2$ , B)  $\text{TiO}_2\text{-DL25}$ , C)  $\text{TiO}_2\text{-DL50}$ , D)  $\text{TiO}_2\text{-DL100}$ , E)  $\text{TiO}_2\text{-DL200}$ , F) DL T.

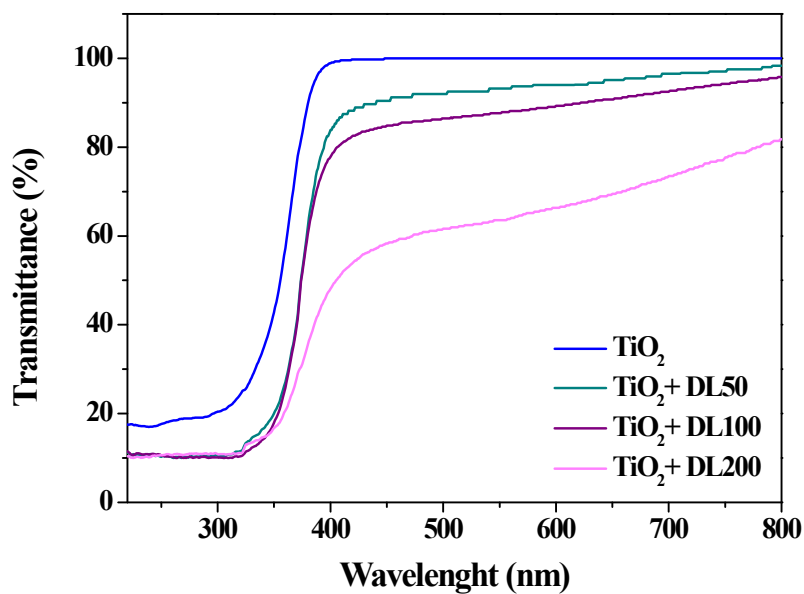

Figure S-8. Transmittance spectra of bare  $\text{TiO}_2$  and of physical mixtures of  $\text{TiO}_2 + \text{DL50}$ ,  $\text{TiO}_2 + \text{DL100}$  and  $\text{TiO}_2 + \text{DL200}$  nanoparticles.

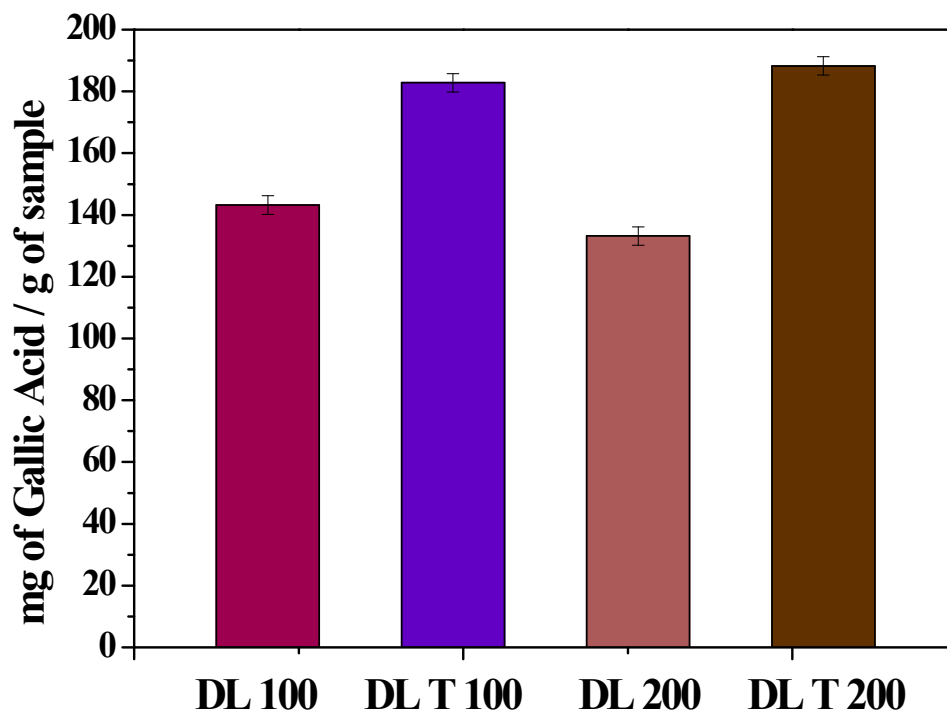

Figure S-9. Total phenolic content of DL100, DL T100, DL200, DL T200 solutions.

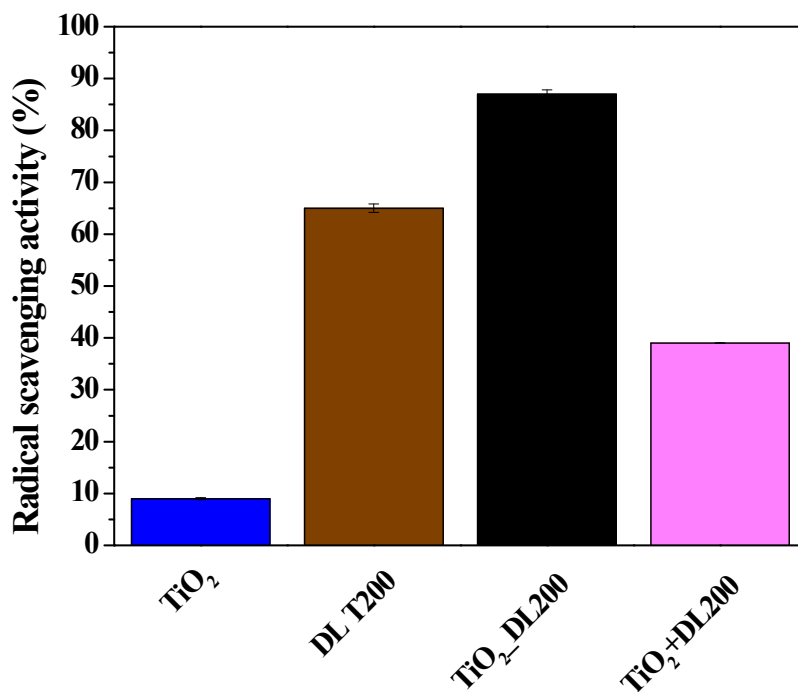

Figure S-10. ABTS radical scavenging activity of TiO<sub>2</sub>, DL T200, TiO<sub>2</sub>\_DL200 and TiO<sub>2</sub> + DL200 samples.

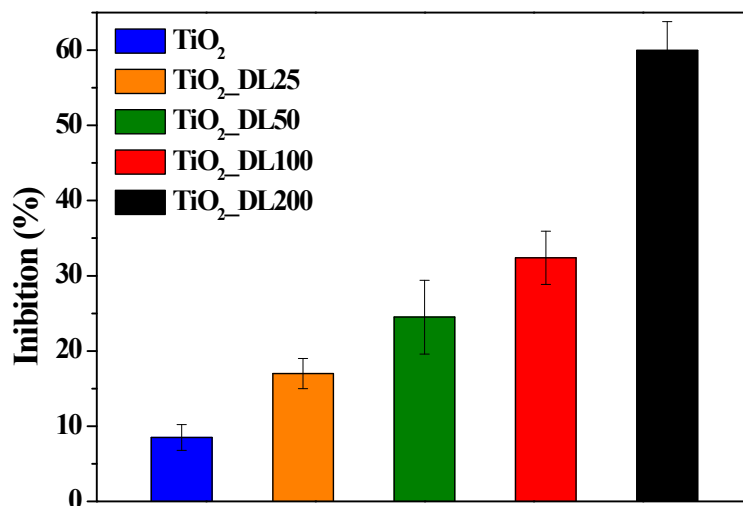

Figure S-11: DPPH analysis on TiO<sub>2</sub>, TiO<sub>2</sub>\_DL100 and TiO<sub>2</sub>\_DL200 nanomaterials.

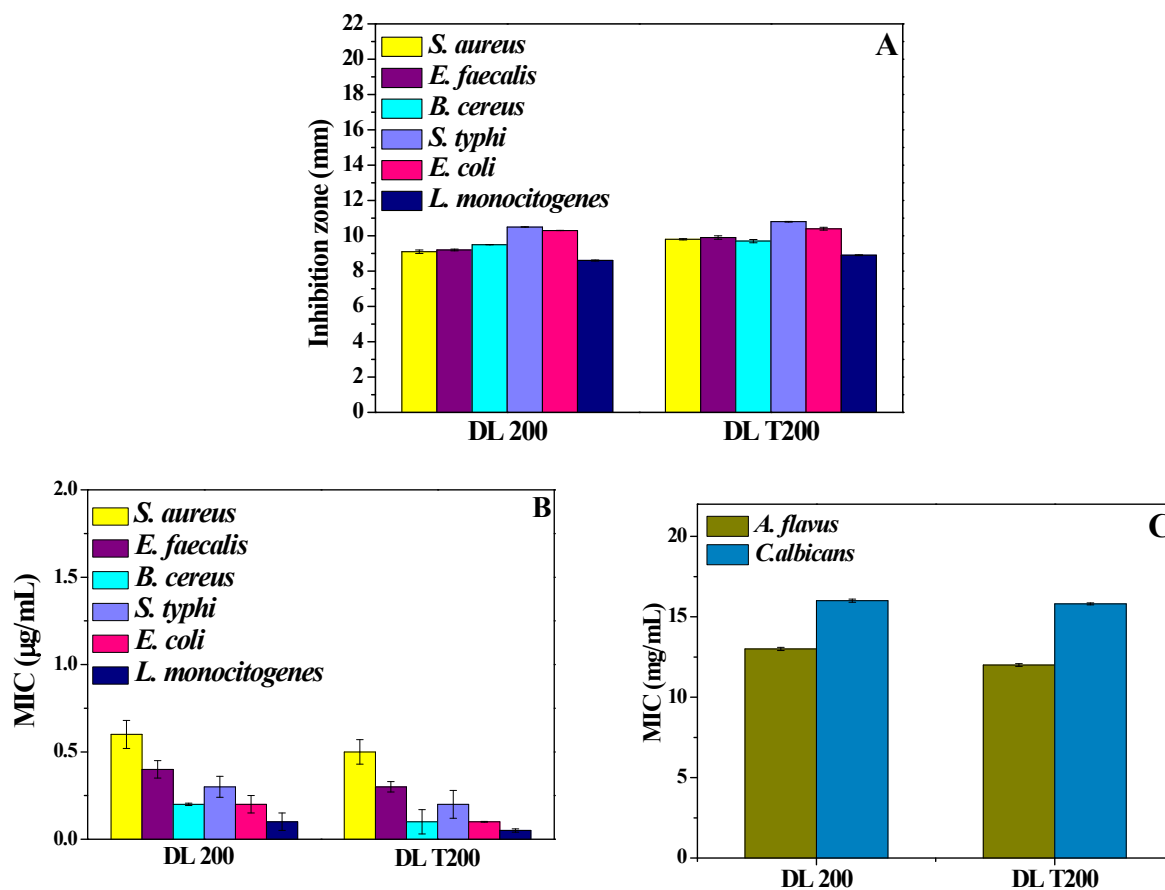

Figure S-12. DDK results (A), MIC against Gram (+) and Gram (-) bacterial (B), MIC against fungi of neat lignin aqueous solution (DL 200) and lignin aqueous solution after the hydrothermal treatment (DL T200) (C).



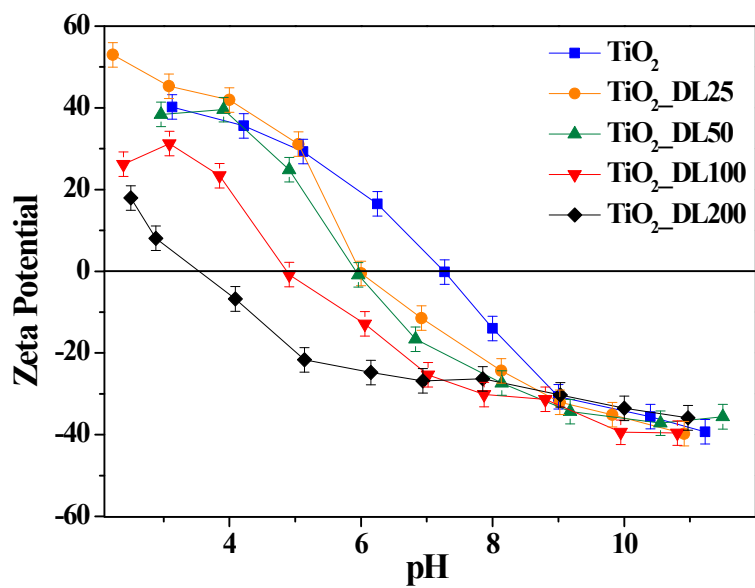

Figure S-13.  $pH_{zpc}$  of all nanoparticles.

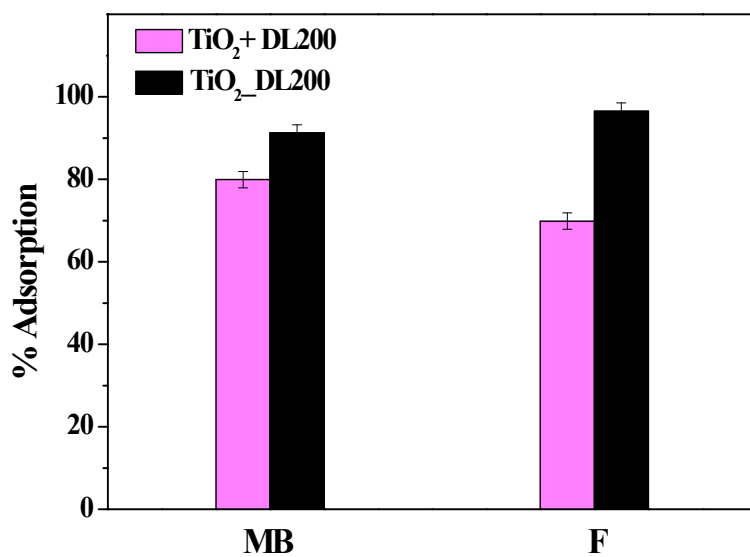

Figure S-14. % MB and % F adsorption capacity of TiO<sub>2</sub>-DL200 hybrid nanoparticles and TiO<sub>2</sub> + DL200 physical mixture;  $t = 60$  min;  $pH = 5.0$ ;  $T = 25$  °C.

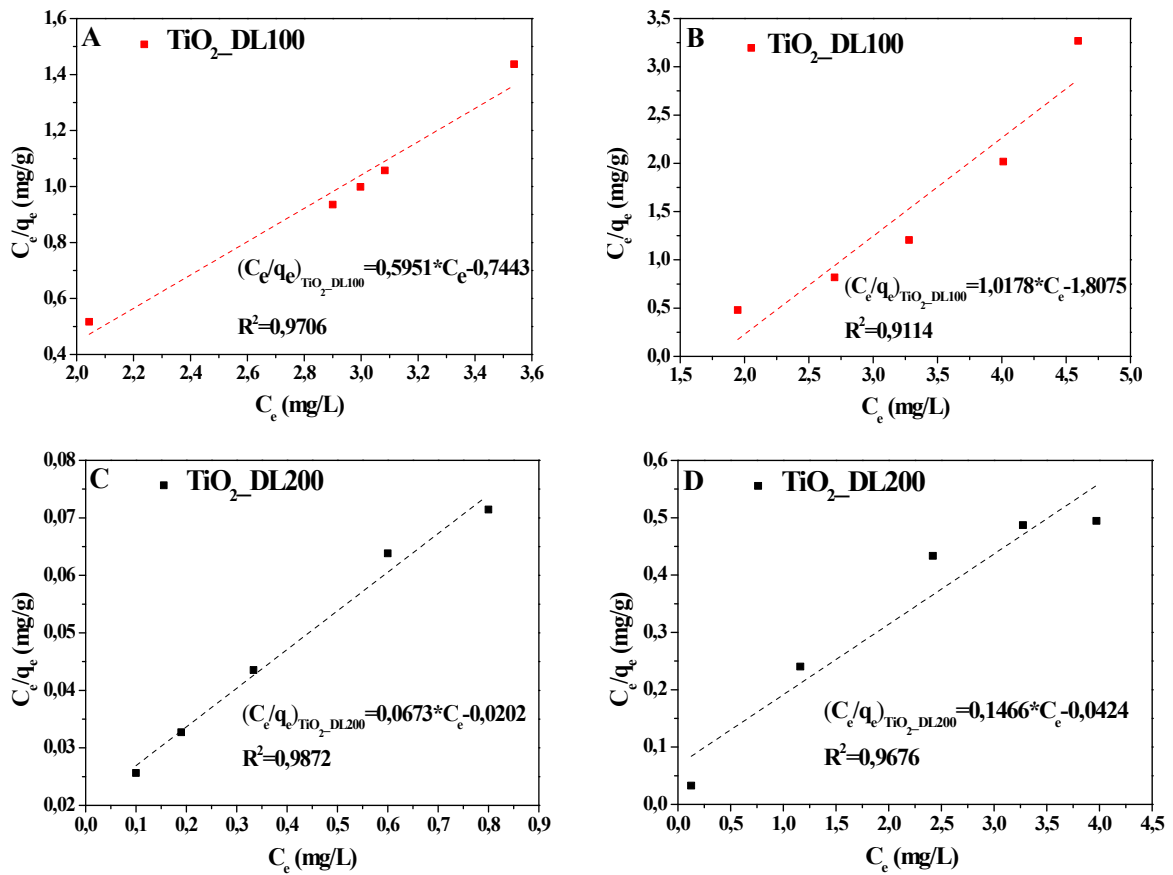

**Figure S-15.** Langmuir adsorption isotherms for MB (A, C) and F (B, D) dyes in the case of TiO<sub>2</sub>\_DL100 and TiO<sub>2</sub>\_DL200 nanoparticles; pH = 5.0; T = 25°C.

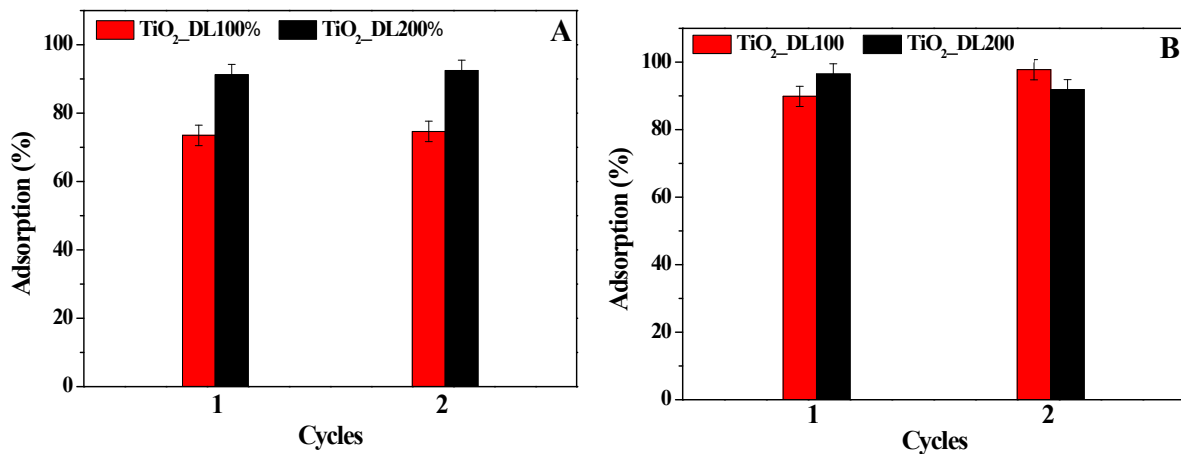

**Figure S-16.** Operational stability of TiO<sub>2</sub>\_DL100 and TiO<sub>2</sub>\_DL200 after two cycles for A) MB and B) F adsorption. t = 60 minutes; pH = 5.0; T = 25 °C.

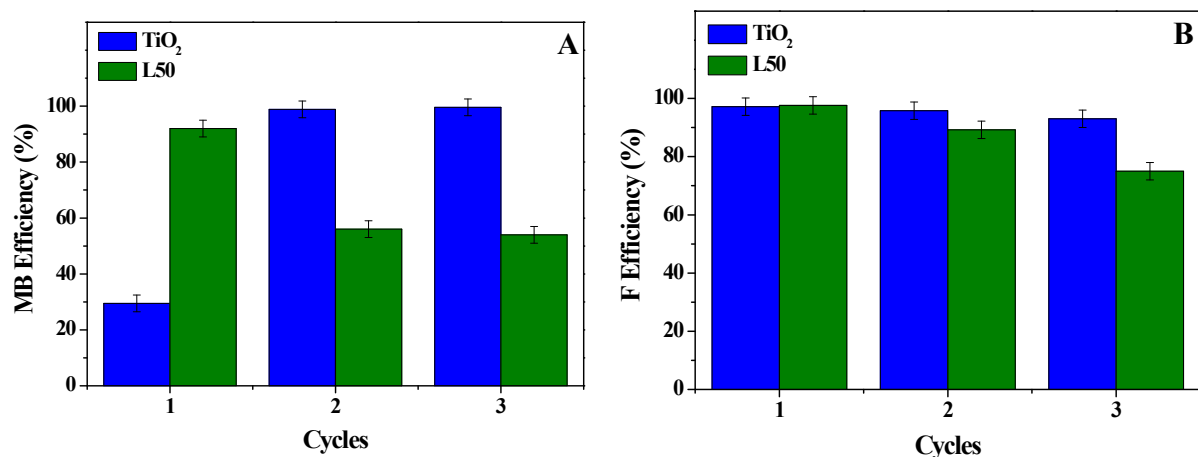

**Figure S-17.** Operational stability of TiO<sub>2</sub> and TiO<sub>2</sub>\_DL50 after up to three cycles for A) MB and B) F photocatalytic removal. Reaction time = 120 minutes.

**Table S-1:** Assignment of FTIR bands of lignin.

| Functional group assignment                                                                  | Wavenumber (cm <sup>-1</sup> ) |
|----------------------------------------------------------------------------------------------|--------------------------------|
| -OH stretching vibration in aromatic and aliphatic hydroxyl groups                           | 3425                           |
| C-H asymmetrical and symmetrical vibrations of the methyl (-C <sup>H</sup> <sub>3</sub> )    | 2940                           |
| C-H asymmetrical and symmetrical vibrations of the methylene (-C <sup>H</sup> <sub>2</sub> ) | 2842                           |
| Vibration of aromatic rings                                                                  | 1590, 1510, and 1420           |
| Methoxyl C-H bending                                                                         | 1461                           |
| Aromatic C-O stretching of Syringyl units                                                    | 1350                           |
| Aromatic C-O stretching of Guaiacyl units                                                    | 1265                           |
| Phenolic -OH units                                                                           | 1220                           |
| Aromatic C-H in plain deformation of the syringyl unit                                       | 1128                           |
| C-O stretching of secondary alcohol                                                          | 1084                           |
| C-O stretching of primary alcohol                                                            | 1012                           |
| Stretching vibration of aliphatic OH/ether                                                   | 1030                           |
| Aromatic C-H vibration out of plain deformation                                              | 852 and 810                    |
| Out-of-plane bending of C-OH                                                                 | 620                            |

**Table S-2.** Hydrodynamic diameters and Zeta potential values of nanoparticles

| Sample                 | Hydrodynamic diameter (D <sub>h</sub> ) (nm) | Standard deviation | Zeta Potential (mV) | Standard deviation |
|------------------------|----------------------------------------------|--------------------|---------------------|--------------------|
| TiO <sub>2</sub>       | 165                                          | ± 2.9              | 25                  | ± 2                |
| TiO <sub>2</sub> _DL25 | 226                                          | ± 4.6              | 23                  | ± 1                |

|                        |      |       |     |     |
|------------------------|------|-------|-----|-----|
| TiO <sub>2</sub> DL50  | 236  | ± 4.3 | -1  | ± 1 |
| TiO <sub>2</sub> DL100 | 910  | ± 1.4 | -15 | ± 1 |
| TiO <sub>2</sub> DL200 | 1016 | ± 4.0 | -17 | ± 2 |

**Table S-3.** Mean crystalline size of all nanoparticles.

| <b>Sample</b>          | <b>Crystalline size (nm)</b> |
|------------------------|------------------------------|
| TiO <sub>2</sub>       | ≈ 7                          |
| TiO <sub>2</sub> DL25  | ≈ 7                          |
| TiO <sub>2</sub> DL50  | ≈ 7                          |
| TiO <sub>2</sub> DL100 | ≈ 8                          |
| TiO <sub>2</sub> DL200 | ≈ 12                         |
